# Supplementary material
Source: PubMed Central journal article supplement (PMC3963590)

## Supplemental dataset 4

These figures show data from a second biological repeat of experiments shown in the main paper figures.

Histone acetylation ratios (as in Figure 1 of the paper).

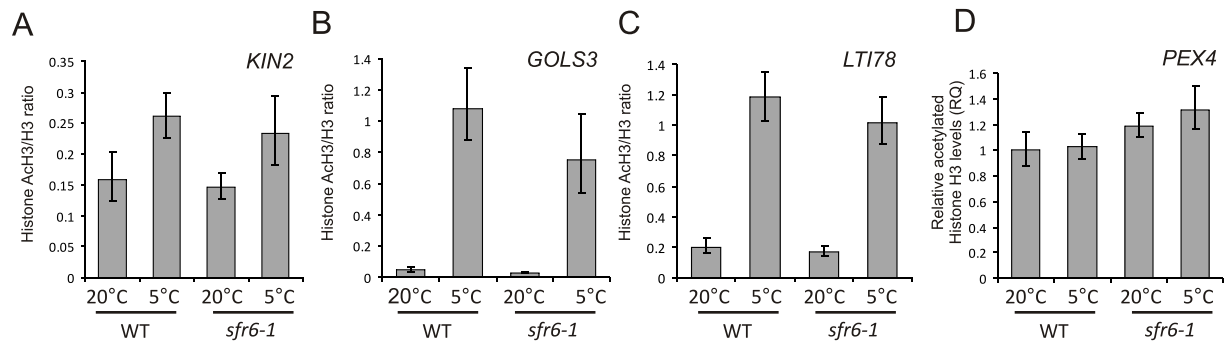

*KIN2*, *GOLS3*, *At1g20030* and *At3g52740* Pol II ChIP in all 3 tail subunit mutants (as in Figures 2 and 6 of the manuscript).

A

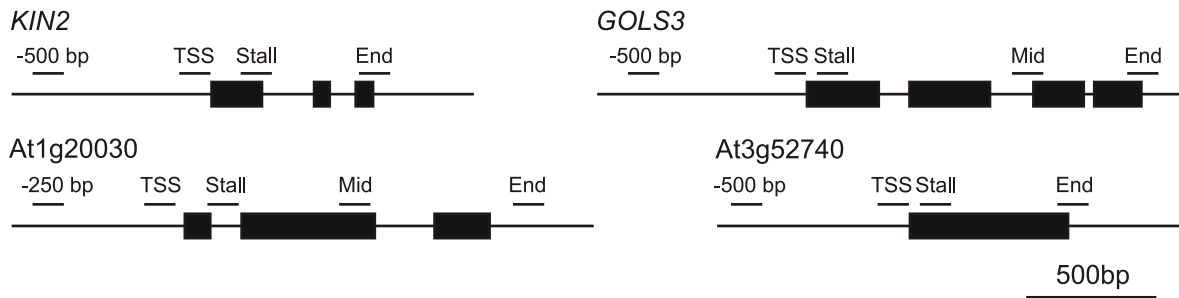

B

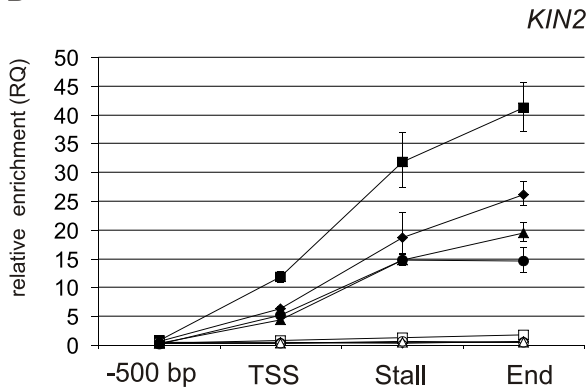

C

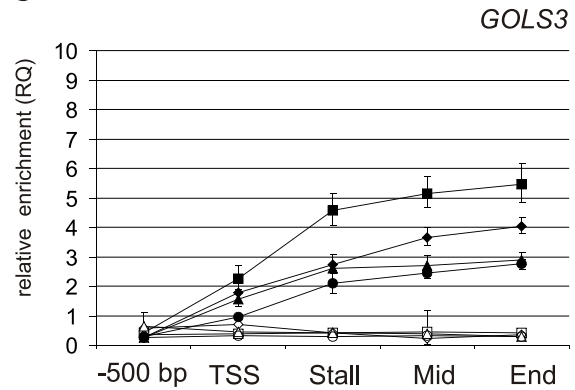

D

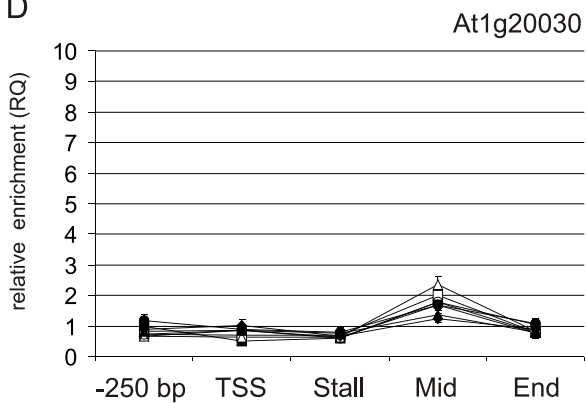

E

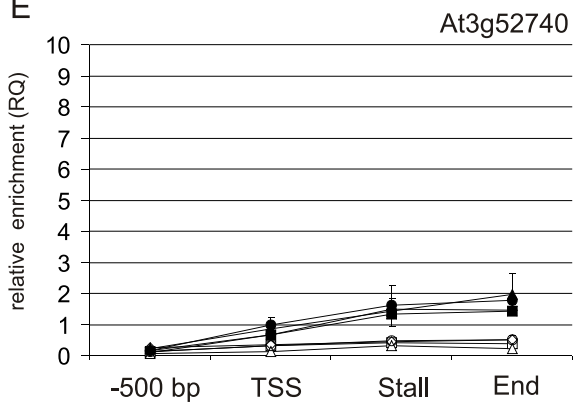

WT 20°C   
  *sfr6-1* 20°C   
  *med2-1* 20°C   
  *med14-2* 20°C  
 WT 5°C   
  *sfr6-1* 5°C   
  *med2-1* 5°C   
  *med14-2* 5°C

Cold gene expression in all mutants (as in Figure 4 of the manuscript)

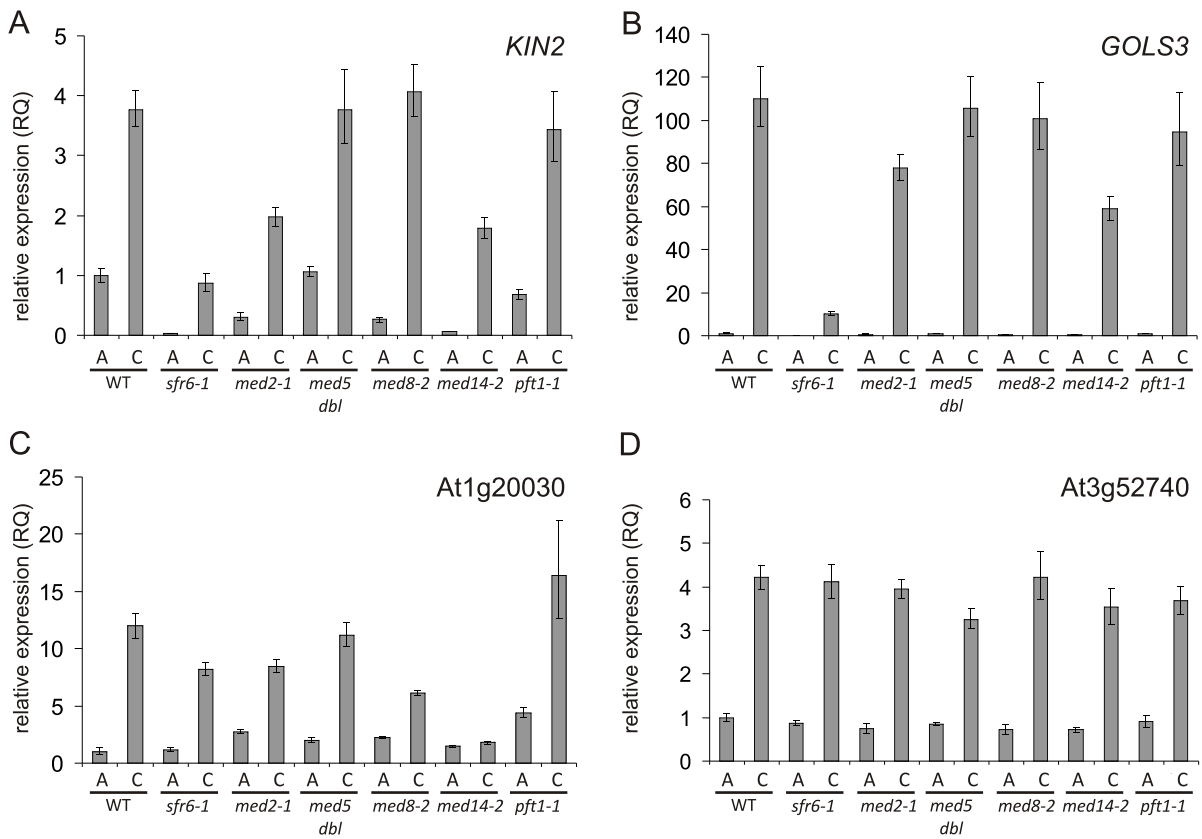

Expression of genes from microarray in 3 tail subunit mutants (as in Figure 5 of the manuscript)

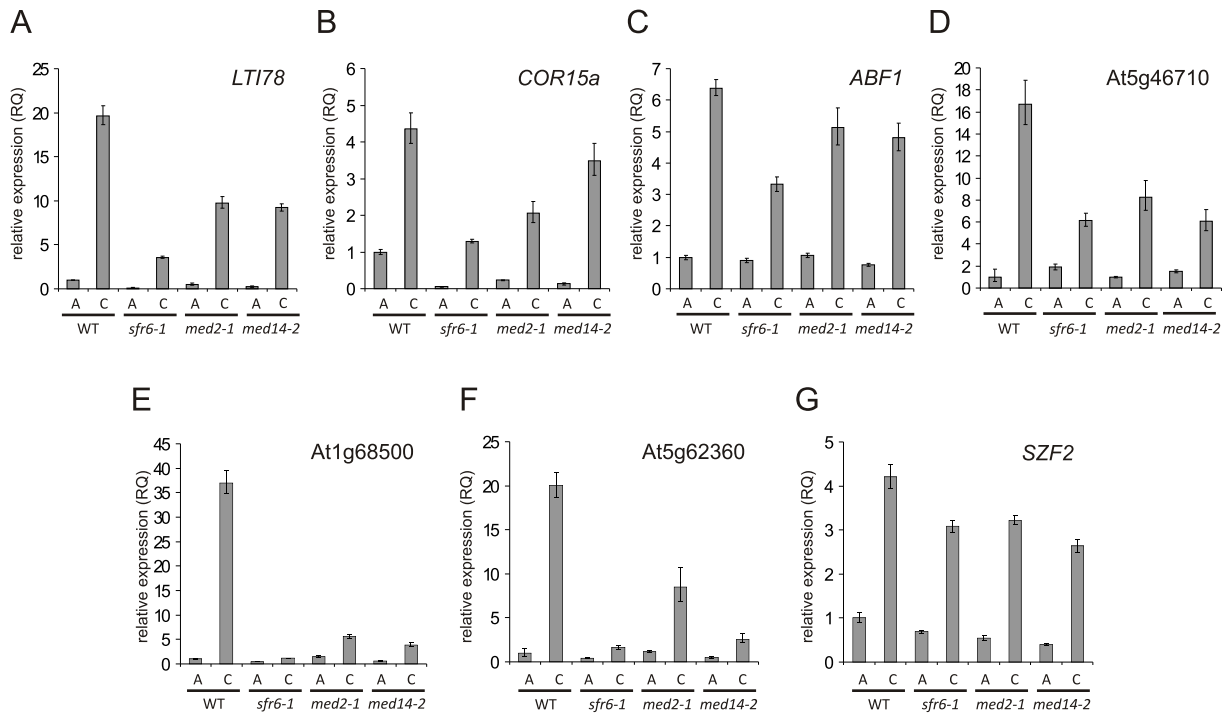

*LT178* and *COR15a* Pol II ChIP in 3 tail subunit mutants (as in Figure 7 of the manuscript).

A

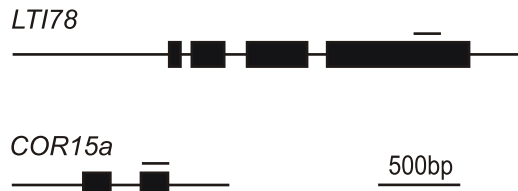

B

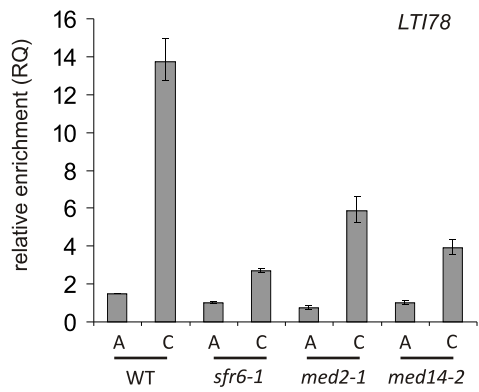

C

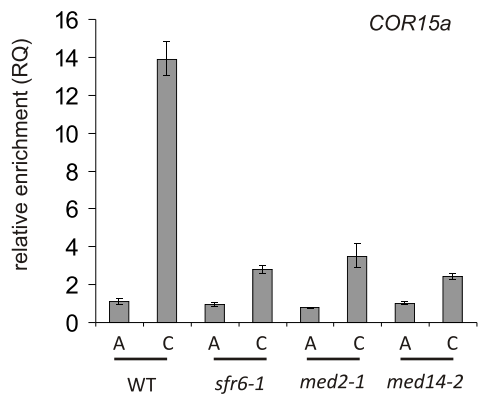

KIN2, GOL53 and At1g20030 MED6 CHIP in 3 tail subunit mutants (as in Figure 9 of the manuscript).

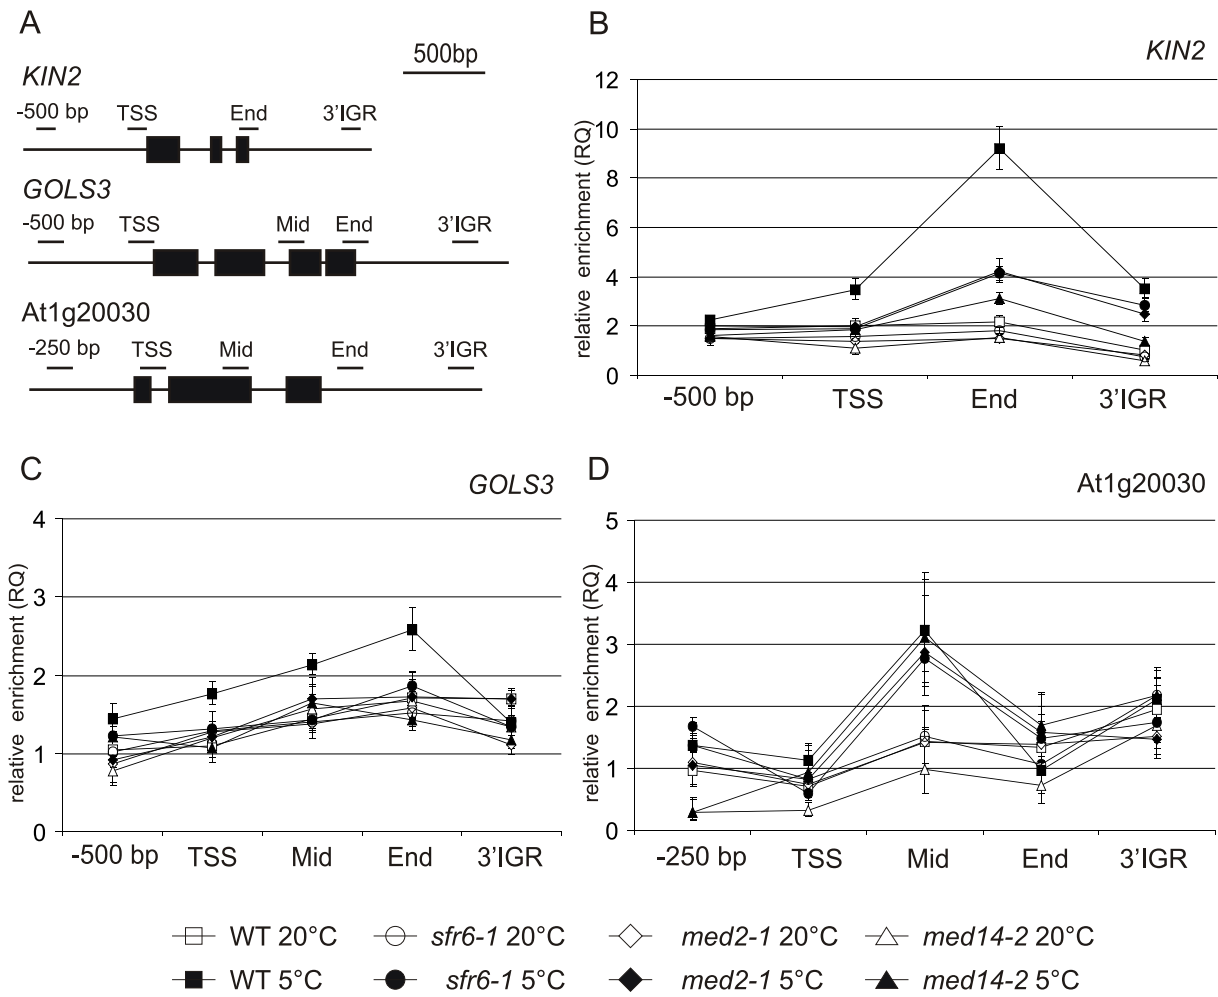

Dark induction in three *sfr6* mutant alleles (as in Figure 10 of the manuscript).

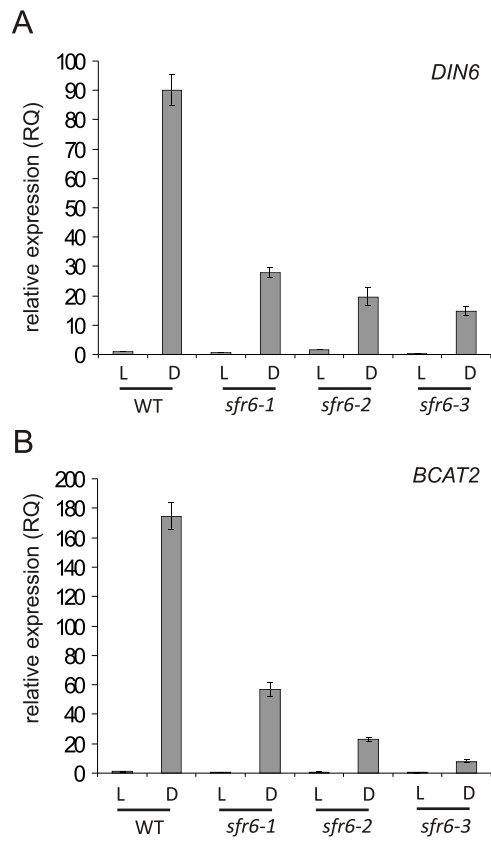

Dark-inducible expression in all Mediator mutants (as in Figure 11 of the manuscript).

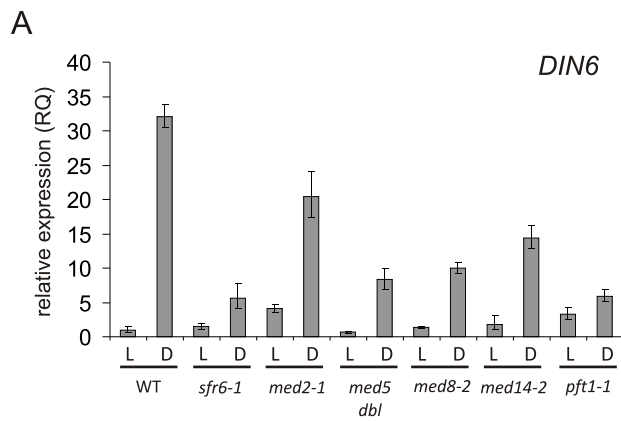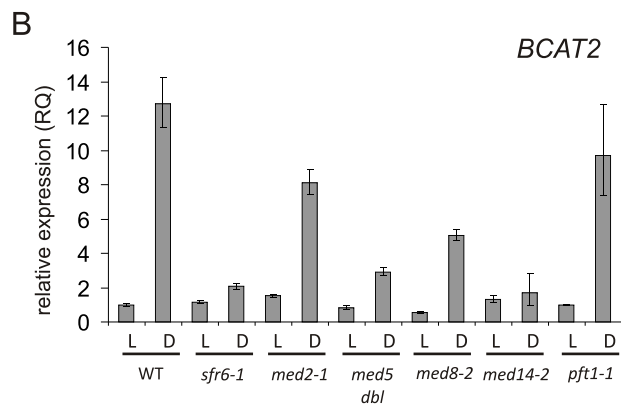

Supplement: supp_tpc.113.117796_tpc117796SupplementalDS4.pdf [file supp_tpc.113.117796_tpc117796SupplementalDS4.pdf]
