# Supplementary material
Source: PubMed Central journal article supplement (PMC3963590)
Supplement: supp_tpc.113.117796_tpc117796Supplemental.pdf [file supp_tpc.113.117796_tpc117796Supplemental.pdf]

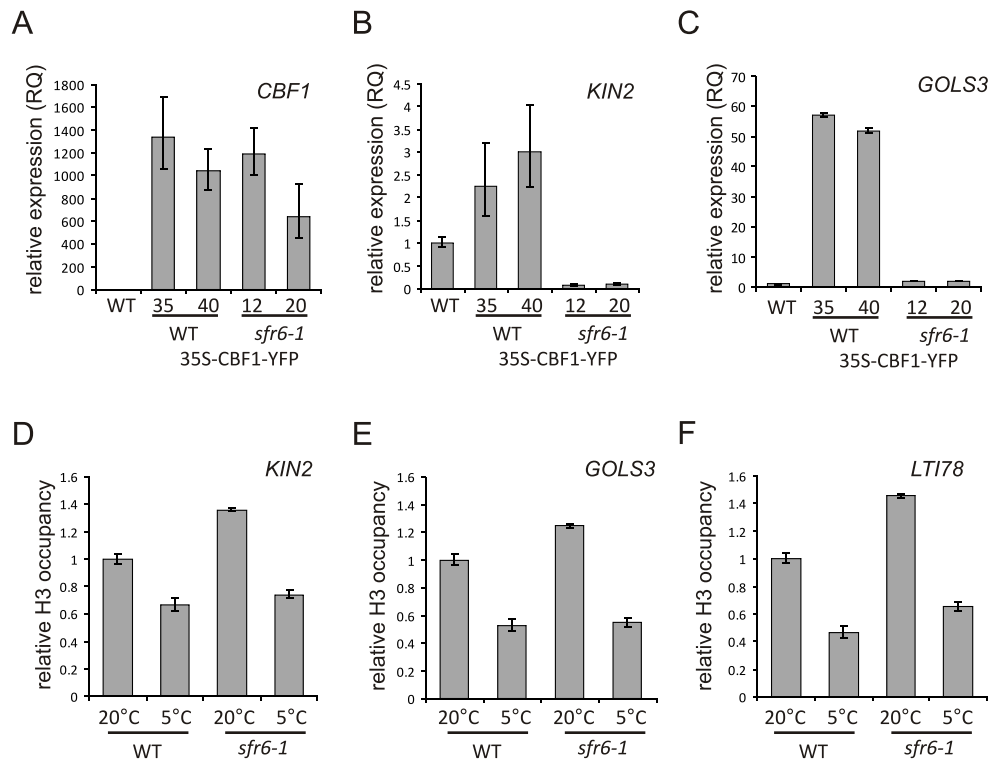

**Supplemental Figure 1. Overexpression of CBF1-YFP elicits *COR* gene expression in WT but not *sfr6-1*. H3 occupancy at *COR* gene promoters alters in response to cold by equivalent amounts in WT and *sfr6-1*.** (A) to (C) CBF1-YFP overexpression elicits expression of *COR* genes in wild type but not *sfr6-1* plants. qRT-PCR analysis of *CBF1* (A), *KIN2* (B) and *GOLDS3* (C) in 8-day-old transgenic *Arabidopsis* seedlings of Col-0 (WT Lines 35 and 40) and *sfr6-1* (lines 12 and 20) expressing 35S-CBF1-YFP compared with non-transgenic Col-0 plants (WT) at ambient temperature. Expression is shown after normalisation to *PEX4*. Each value represents the mean of three technical replicates for each sample normalised to the mean of three technical replicates for *PEX4*. The error bars represent  $RQ_{MIN}$  and  $RQ_{MAX}$  and constitute the acceptable error level for a 95% confidence level according to Student's *t*-test. (D) to (F) ChIP qRT-PCR analysis of relative levels of histone H3 at *KIN2* (D), *GOLDS3* (E) and *LTI78* (F) promoters in 3-week-old plants exposed to 5C or maintained at 20C for 4 h indicates that cold treatment reduces Histone H3 occupancy at *COR* gene promoters and acts independently of SFR6/MED16. Data represent proportion of histone H3 at a given promoter referenced against input and standardised against relative *PEX4* histone H3 occupancy. Each value represents the mean of three technical replicates. The error bars represent  $RQ_{MIN}$  and  $RQ_{MAX}$  and constitute the acceptable error level for a 95% confidence level according to Student's *t*-test. Data are representative of 2 biological replicates.

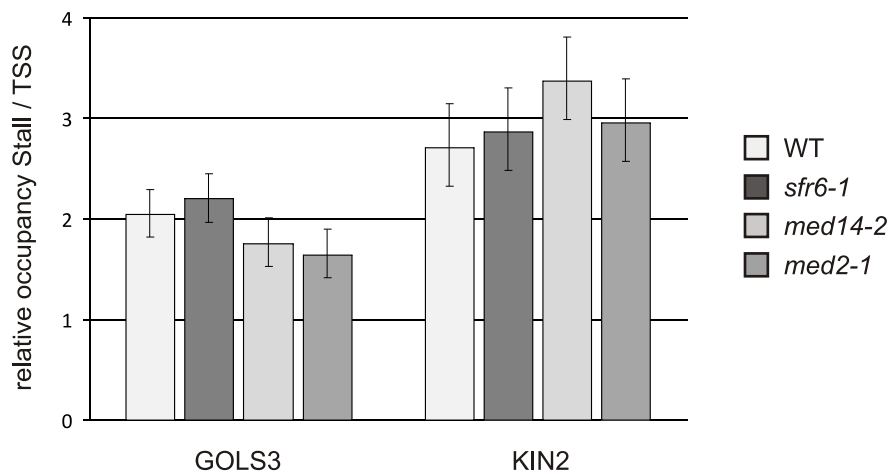

**Supplemental Figure 2. The ratio of RNA polymerase II occupancy at stall sites to occupancy at TSS sites in WT Col-0 and *sfr6-1*, *med2-1* and *med14-2* mutant plants after 4h at 5C is similar.** Data used to calculate ratios are the same as those shown in Figure 2 and Figure 6. Pol II abundance at the stall site is referenced to input and standardised to Pol II abundance at the TSS referenced to input. Each value represents the mean of three technical replicates for each sample. The error bars represent  $RQ_{MIN}$  and  $RQ_{MAX}$  and constitute the acceptable error level for a 95% confidence level according to Student's t-test.

A

| Transcription Factors (TF)             |                              |            |                                   |             |                              |
|----------------------------------------|------------------------------|------------|-----------------------------------|-------------|------------------------------|
| Check All                              | Check Enriched               | Check None | Check Inverted                    | Refresh     |                              |
| P-value                                | Name                         | #P         | #S Select                         | P-value     | Name                         |
| #P = Number of promoters with TF sites |                              |            | #S = Number of predicted TF sites |             |                              |
| <b>Enriched TF sites</b>               |                              |            |                                   |             |                              |
| $< 10^{-3}$                            | ABRE binding site motif      | 9          | 10                                | $< 10^{-7}$ | ABRE-like binding site motif |
| $< 10^{-4}$                            | CACGTGMOTIF                  | 21         | 46                                | $< 10^{-5}$ | CBF1 BS in cor15a            |
| $< 10^{-10}$                           | DRE core motif               | 48         | 70                                | $< 10^{-9}$ | DREB1A/CBF3                  |
| $< 10^{-7}$                            | EveningElement promoter moti | 16         | 18                                | $< 10^{-8}$ | LTRE promoter motif          |
| $< 10^{-3}$                            | TATA-box Motif               | 64         | 126                               |             |                              |
| <b>Non-enriched TF sites</b>           |                              |            |                                   |             |                              |
| 0.0018                                 | ABFs binding site motif      | 7          | 8                                 | 0.0365      | ABREATRD22                   |
| 0.0010                                 | ACGTABREMOTIFA2OSEM          | 17         | 20                                | 0.3719      | ARF binding site motif       |
| 0.2084                                 | ATHB1 binding site motif     | 2          | 4                                 | 0.0801      | ATHB2 binding site motif     |
| 0.3442                                 | ATHB2ATCONSENSUS             | 1          | 2                                 | 0.1336      | ATHB5ATCORE                  |
| 0.4755                                 | ATHB6 binding site motif     | 2          | 2                                 | 0.0205      | AtMYB2 BS in RD22            |
| 0.0109                                 | AtMYC2 BS in RD22            | 23         | 28                                | 0.5537      | BoxII promoter motif         |
| 0.1004                                 | CARGCW&GAT                   | 36         | 110                               | 0.2110      | CArG promoter motif          |
| 0.0426                                 | CCA1 binding site motif      | 18         | 20                                | 0.4013      | CDA1ATCAB2                   |
| 0.2440                                 | E2F binding site motif       | 2          | 2                                 | 0.4100      | E2FAT                        |
| 0.0297                                 | GADOWNAT                     | 9          | 10                                | 0.8354      | GAREAT                       |
| 0.0010                                 | GBF1/2/3 BS in ADH1          | 5          | 10                                | 0.0032      | GBOXLERBCS                   |
| 0.3057                                 | GCC-box promoter motif       | 4          | 4                                 | 0.5653      | Gap-box Motif                |
| 0.0777                                 | HY5AT                        | 1          | 1                                 | 0.9278      | Hexamer promoter motif       |
| 0.4391                                 | Ibox promoter motif          | 18         | 22                                | 0.1542      | L1-box promoter motif        |
| 0.3249                                 | LEAFYATAG                    | 5          | 5                                 | 0.5152      | MYB binding site promoter    |
| 0.8973                                 | MYB1 binding site motif      | 1          | 1                                 | 0.0172      | MYB1AT                       |
| 0.3641                                 | MYB1LEPR                     | 8          | 9                                 | 0.3883      | MYB2AT                       |
| 0.5989                                 | MYB3 binding site motif      | 2          | 2                                 | 0.2338      | MYB4 binding site motif      |
| 0.0109                                 | MYCATERD1                    | 23         | 28                                | 0.4763      | RAV1-B binding site motif    |
| 0.1851                                 | SV40 core promoter motif     | 10         | 10                                | 0.6417      | T-box promoter motif         |
| 0.4658                                 | TGA1 binding site motif      | 2          | 2                                 | 0.2750      | UPRE2AT                      |
| 0.4658                                 | UPRMOTIFAT                   | 2          | 2                                 | 0.0250      | UPRMOTIFHAT                  |
| 0.7305                                 | W-box promoter motif         | 32         | 54                                | 0.0206      | Z-box promoter motif         |
| <b>Depleted TF sites</b>               |                              |            |                                   |             |                              |
| No binding factors found               |                              |            |                                   |             |                              |

B

| Transcription Factors (TF)             |                              |            |                                   |         |                              |
|----------------------------------------|------------------------------|------------|-----------------------------------|---------|------------------------------|
| Check All                              | Check Enriched               | Check None | Check Inverted                    | Refresh |                              |
| P-value                                | Name                         | #P         | #S Select                         | P-value | Name                         |
| #P = Number of promoters with TF sites |                              |            | #S = Number of predicted TF sites |         |                              |
| <b>Enriched TF sites</b>               |                              |            |                                   |         |                              |
| No binding factors found               |                              |            |                                   |         |                              |
| <b>Non-enriched TF sites</b>           |                              |            |                                   |         |                              |
| 0.2046                                 | ABFs binding site motif      | 4          | 4                                 | 0.4399  | ABRE binding site motif      |
| 0.0547                                 | ABRE-like binding site motif | 21         | 30                                | 0.5318  | ABREATRD22                   |
| 0.0288                                 | ACGTABREMOTIFA2OSEM          | 17         | 22                                | 0.0617  | AGCBOXPGLB                   |
| 0.6035                                 | AGL2ATCONSENSUS              | 1          | 1                                 | 0.0448  | AP1 BS in AP3                |
| 0.7154                                 | ARF binding site motif       | 23         | 30                                | 0.4523  | ATHB1 binding site motif     |
| 0.8297                                 | ATHB2 binding site motif     | 6          | 9                                 | 0.1714  | ATHB2ATCONSENSUS             |
| 0.1908                                 | ATHB5ATCORE                  | 4          | 10                                | 0.1494  | ATHB6 binding site motif     |
| 0.4189                                 | AtMYB2 BS in RD22            | 9          | 10                                | 0.6270  | AtMYC2 BS in RD22            |
| 0.7543                                 | BoxII promoter motif         | 27         | 40                                | 0.1221  | CACGTGMOTIF                  |
| 0.6034                                 | CARGCW&GAT                   | 43         | 124                               | 0.9625  | CArG promoter motif          |
| 0.7448                                 | CCA1 binding site motif      | 17         | 20                                | 0.1908  | CDA1ATCAB2                   |
| 0.2281                                 | DRE core motif               | 18         | 25                                | 0.7082  | DREB1A/CBF3                  |
| 0.4210                                 | E2F binding site motif       | 2          | 2                                 | 0.2478  | EveningElement promoter moti |
| 0.0087                                 | GADOWNAT                     | 13         | 14                                | 0.8705  | GAREAT                       |
| 0.6634                                 | GBF1/2/3 BS in ADH1          | 1          | 2                                 | 0.2956  | GBOXLERBCS                   |
| 0.1357                                 | GCC-box promoter motif       | 7          | 8                                 | 0.0038  | Gap-box Motif                |
| 0.0974                                 | HY5AT                        | 1          | 1                                 | 0.2956  | Hexamer promoter motif       |
| 0.9244                                 | Ibox promoter motif          | 21         | 24                                | 0.5076  | L1-box promoter motif        |
| 0.9113                                 | LEAFYATAG                    | 4          | 4                                 | 0.1295  | LTRE promoter motif          |
| 0.0492                                 | MYB binding site promoter    | 27         | 30                                | 0.5460  | MYB1 binding site motif      |
| 0.9637                                 | MYB1AT                       | 53         | 129                               | 0.5142  | MYB1LEPR                     |
| 0.0995                                 | MYB2 binding site motif      | 3          | 3                                 | 0.3514  | MYB2AT                       |
| 0.9769                                 | MYB3 binding site motif      | 1          | 1                                 | 0.3554  | MYB4 binding site motif      |
| 0.6270                                 | MYCATERD1                    | 23         | 32                                | 0.0026  | PRHA BS in PAL1              |
| 0.7790                                 | RAV1-B binding site motif    | 6          | 6                                 | 0.9023  | RY-repeat promoter motif     |
| 0.5971                                 | SV40 core promoter motif     | 12         | 14                                | 0.7972  | T-box promoter motif         |
| 0.8296                                 | TATA-box Motif               | 58         | 179                               | 0.0385  | TELO-box promoter motif      |
| 0.1827                                 | TGA1 binding site motif      | 4          | 4                                 | 0.0671  | UPRE2AT                      |
| 0.1827                                 | UPRMOTIFAT                   | 4          | 4                                 | 0.9123  | UPRMOTIFHAT                  |
| 0.2162                                 | W-box promoter motif         | 51         | 90                                | 0.1087  | Z-box promoter motif         |
| <b>Depleted TF sites</b>               |                              |            |                                   |         |                              |
| No binding factors found               |                              |            |                                   |         |                              |

**Supplemental Figure 3. CRT/DRE and EE are enriched in cold upregulated genes that are downregulated in *sfr6* mutants.** The Athena program was used to detect the presence of known transcription factor binding sites in (A) the 81 cold upregulated genes that showed reduced expression in *sfr6* mutants (Supplemental Dataset 2) and in (B) the 81 cold upregulated genes that showed wild type levels of expression in *sfr6* mutants (Supplemental Dataset 3).

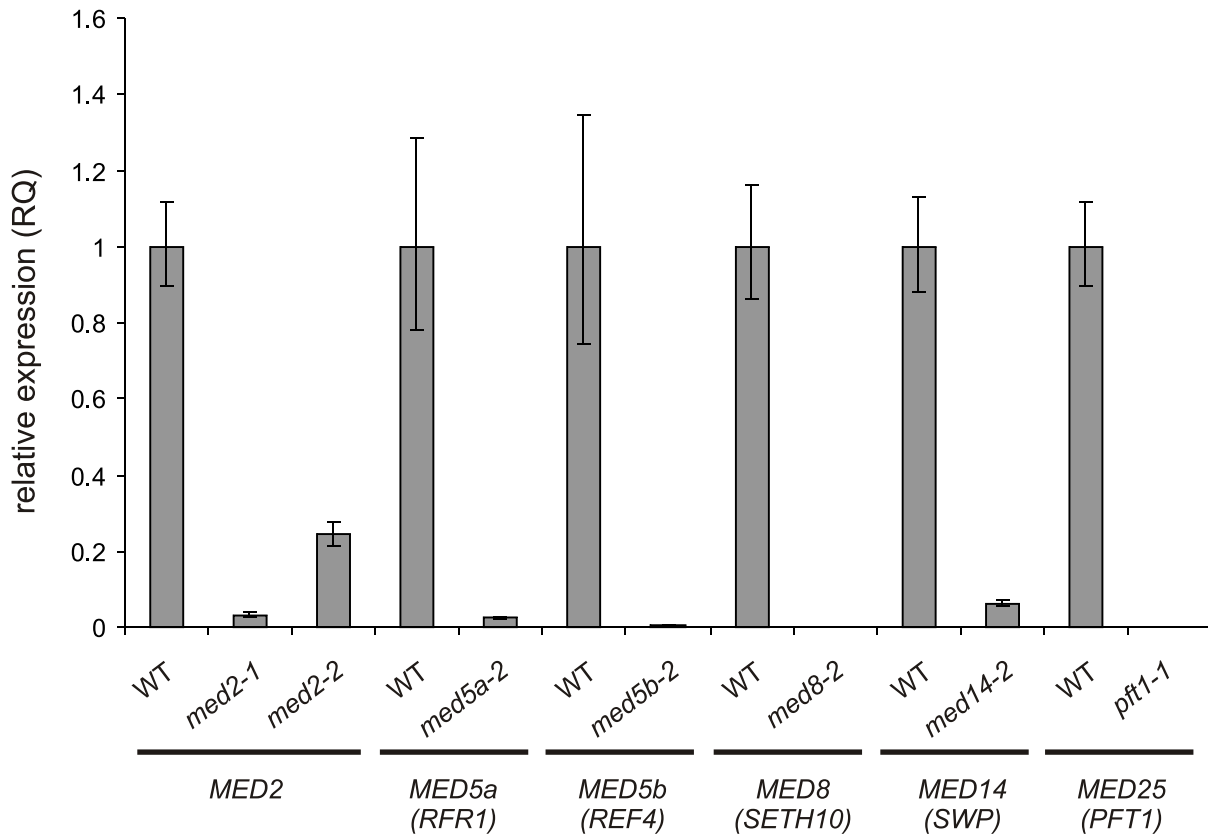

**Supplemental Figure 4. Mediator subunit transcript levels in Mediator subunit mutants.** Expression is shown after normalisation to *PEX4* using qRT-PCR. Relative quantitation of transcript was made from 8-day-old seedlings of WT Col-0 and mutant plants. Expression is shown after normalisation to *PEX4* using qRT-PCR. Each value represents the mean of three technical replicates for each sample normalised to the mean of three technical replicates for *PEX4*. The error bars represent  $RQ_{\text{MIN}}$  and  $RQ_{\text{MAX}}$  and constitute the acceptable error level for a 95% confidence level according to Student's t-test. Results are representative of at least 2 biological replicates.

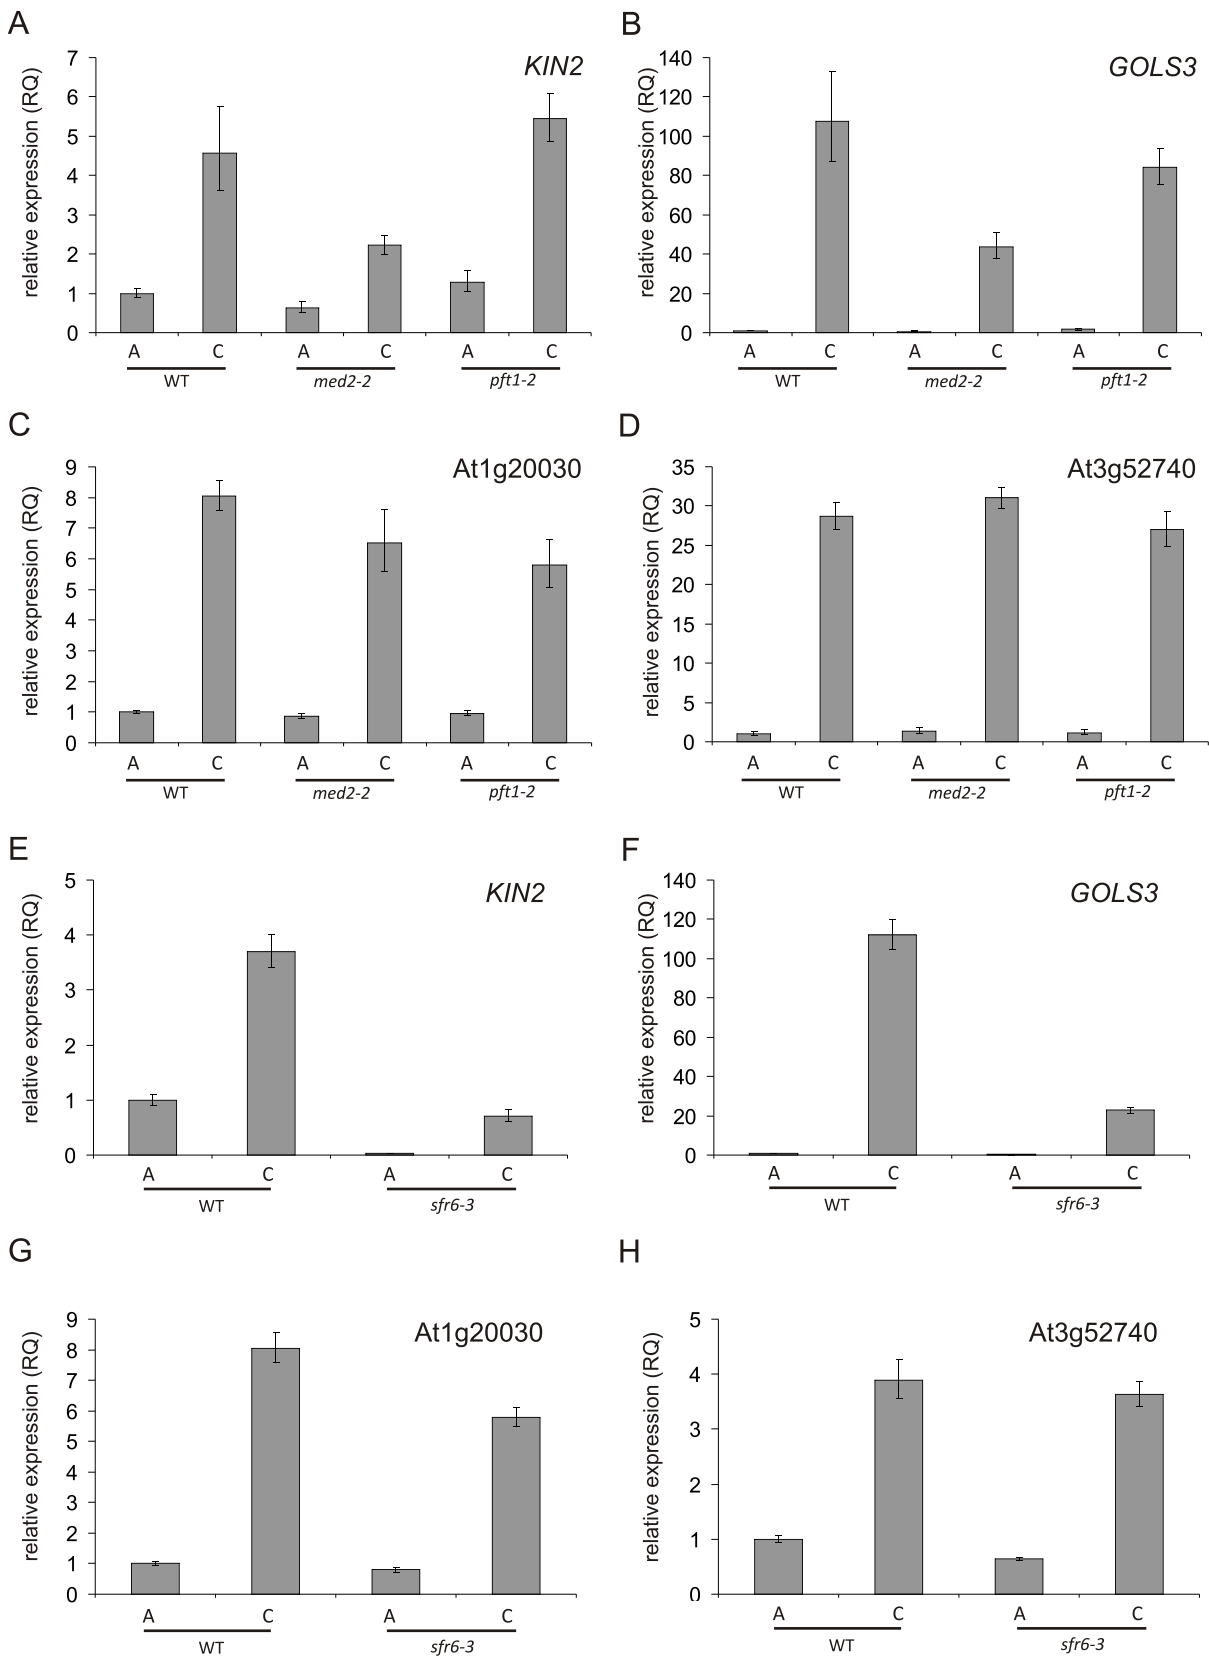

**Supplemental Figure 5. Cold-responsive gene expression in *med2-2*, *pft1-2* and *sfr6-3* compared with wild type is similar to that seen in *med2-1*, *pft1-1* and *sfr6-1* respectively. (A) to (D) Expression of *KIN2* (A), *GOL33* (B), *At1g20030* (C) and *At3g52740* (D) in Col-0 WT, *med2-2* and *pft1-2*. (E) to (H) Expression of *KIN2* (E), *GOL33* (F), *At1g20030* (G) and *At3g52740* (H) in Col-0 WT and *sfr6-3*. Measurements were made on 8-day-old seedlings of WT Col-0 and Mediator subunit mutants exposed to cold (C) temperatures (5C) for 6 h or maintained at ambient (A) temperature (20C).**

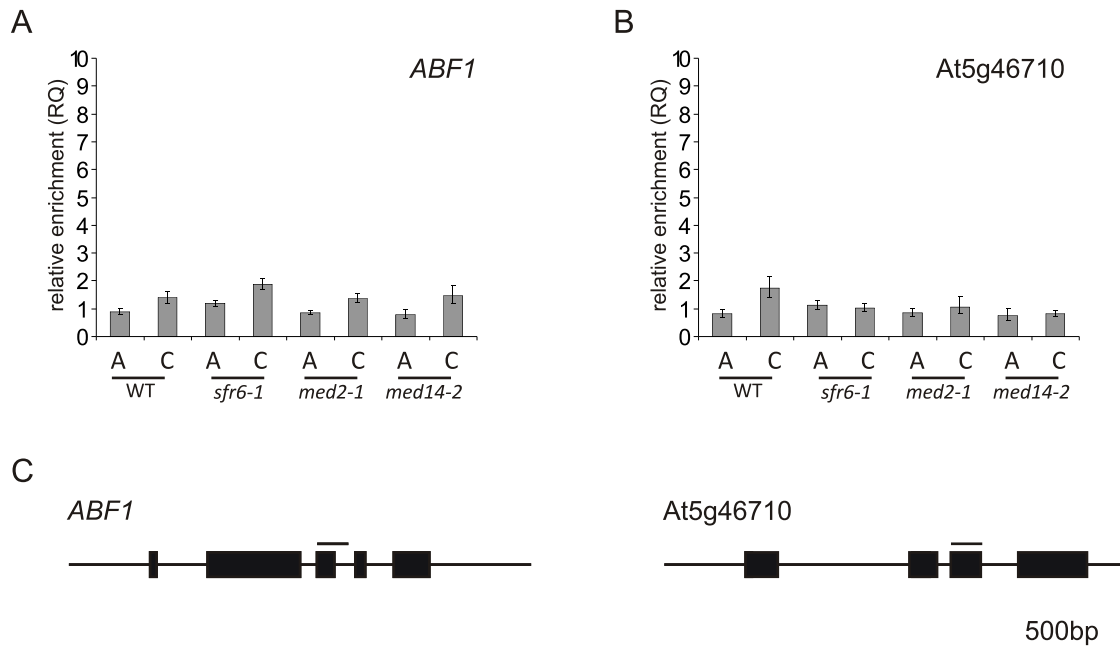

**Supplemental Figure 6. RNA polymerase II recruitment and progression along cold-responsive genes in WT Col-0, *sfr6-1*, *med2-1* and *med14-2* mutants. (A) to (B)** Pol II abundance was measured in 14-day-old seedlings of WT Col-0 and Mediator subunit mutants exposed to cold (C) temperatures (5C) or maintained at ambient (A) temperature (20C) for 6 h. in the middle of the transcribed region of *ABF1* (A) and *At5g46710* (B) at the positions shown in (C). Thick black bars indicate the exons of the gene and thin black lines above show the regions amplified by the primers in each ChIP reaction. ChIP enrichment at each location is referenced to input and enrichment at each location was standardised to Pol II abundance at *PEX4* in the same ChIP sample. Each value represents the mean of three technical replicates for each sample normalised to the mean of three technical replicates for *PEX4*. The error bars represent  $RQ_{MIN}$  and  $RQ_{MAX}$  and constitute the acceptable error level for a 95% confidence level according to Student's t-test. Results are representative of 2 biological replicates.

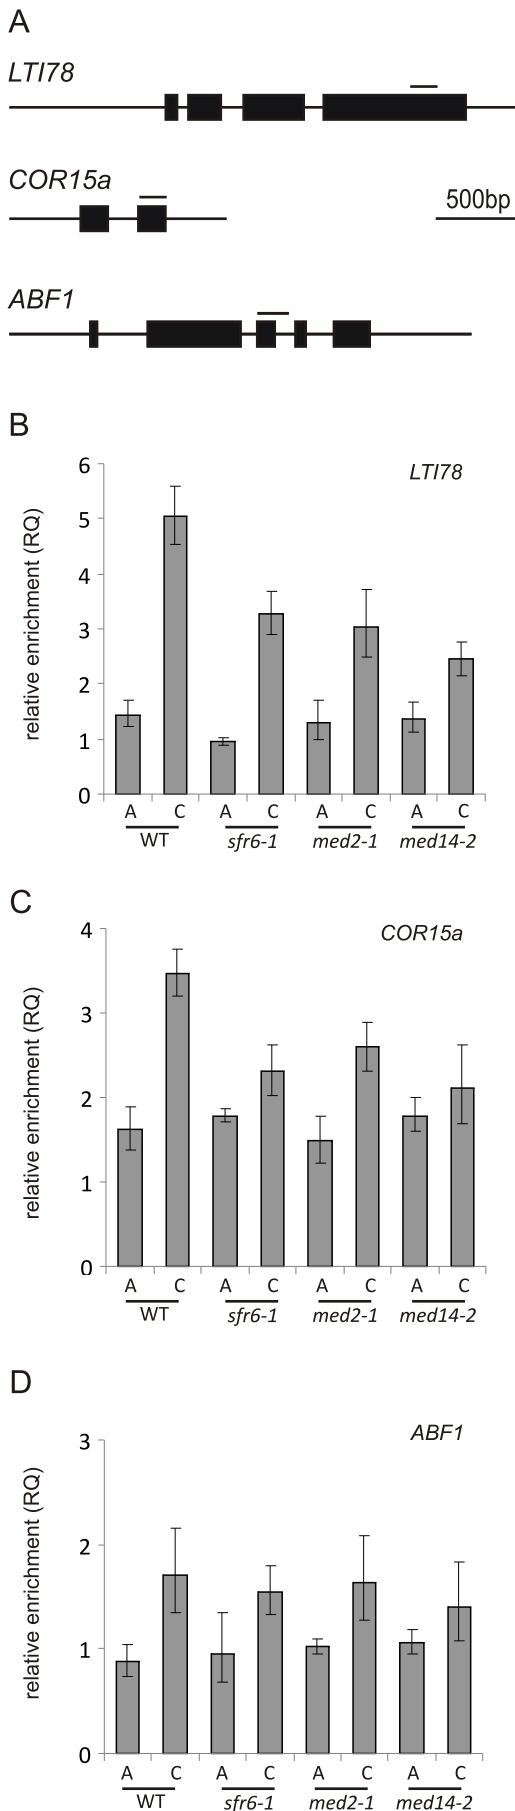

**Supplemental Figure 7. Mediator recruitment to further CRT- and EE-containing genes.** ChIP qRT-PCR analysis of relative abundance of MED6 (a core Mediator subunit) at the transcribed region of genes in 14-day-old seedlings of Col-0 (WT), *sfr6-1*, *med2-1* and *med14-2* mutants. Mediator recruitment was monitored at the positions shown in (A). Thick black bars indicate the exons of the gene and thin black lines above show the regions amplified by the primers in each ChIP reaction. (B) to (C) Mediator recruitment to two CBF-controlled CRT-containing genes, *LTI78* (B) and *COR15A* (C) increases in the cold and, as at *KIN2* and *GOLS3*, is impaired in *sfr6*, *med2* and *med14* mutants. (D) Mediator recruitment to one further EE-containing gene, *ABF1* increases slightly in response to cold but is unaffected in *sfr6*, *med2* and *med14* mutants. ChIP enrichment is referenced to input and standardised to MED6 abundance at *PEX4* in the same ChIP sample. Values were calculated using the  $\Delta\Delta C_T$  method and the error bars represent  $RQ_{MIN}$  and  $RQ_{MAX}$  and constitute the acceptable error level for a 95% confidence level according to Student's *t*-test. Data is from one preliminary experiment only and serves as a comparison with other replicated experiments on different genes of the same class. Error bars indicate the level of variation between technical replicates within this experiment.

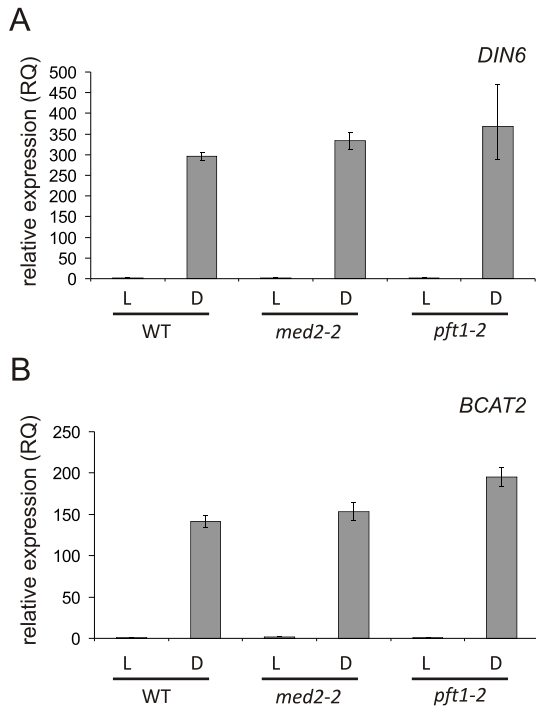

**Supplemental Figure 8. Dark-responsive gene expression is not reduced in *med2-2* and *pft1-2*, similar to *med2-1* and *pft1-1* respectively.** Expression of *DIN6* (A) and *BCAT2* (B) in *med2-2* and *pft1-2*. Measurements were made on 8-day-old seedlings of WT Col-0 and Mediator subunit mutants exposed to darkness (D) or maintained in the light (L) for 6 h. Expression is shown after normalisation to *PEX4*. Each value represents the mean of three technical replicates for each sample normalised to the mean of three technical replicates for *PEX4*. The error bars represent  $RQ_{MIN}$  and  $RQ_{MAX}$  and constitute the acceptable error level for a 95% confidence level according to Student's t-test. Results are representative of 2 biological replicates.



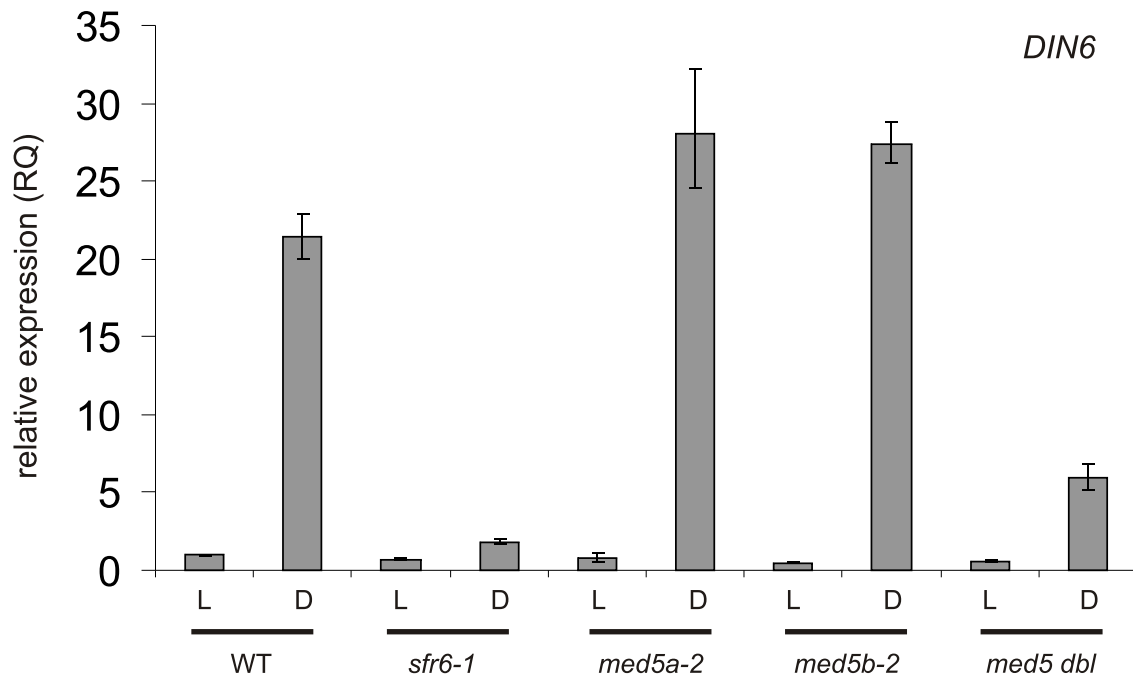

**Supplemental Figure 9. Expression of dark-induced *DIN6* is reduced in *med5amed5b* double mutants but not in *med5a* or *med5b* single mutants.**

Measurements were made on 8-day-old seedlings of WT Col-0 and Mediator subunit mutants exposed to darkness (D) or maintained in the light (L) for 6 h. Expression is shown after normalisation to *PEX4*. Each value represents the mean of three technical replicates for each sample normalised to the mean of three technical replicates for *PEX4*. The error bars represent  $RQ_{MIN}$  and  $RQ_{MAX}$  and constitute the acceptable error level for a 95% confidence level according to Student's t-test. Results are representative of 2 biological replicates.

**Supplemental Table 1.** Table showing frequencies of occurrence of heptamer sequences in the promoters of the 81 genes misregulated in *sfr6* mutants, and probabilities of occurrence relative to whole genome. Ten motifs used to produce consensus for CRT/DRE (Figure 3) are denoted by superscript "a", and single EE-like motif by superscript "b".

| Motif                | Observed occurrence | Expected occurrence | Occurrence probability |
|----------------------|---------------------|---------------------|------------------------|
| gaccgac <sup>a</sup> | 16                  | 1.19                | 2.5x10 <sup>-13</sup>  |
| atgtcgg <sup>a</sup> | 19                  | 2.18                | 2.7x10 <sup>-12</sup>  |
| aaatac <sup>b</sup>  | 60                  | 23.68               | 2.9x10 <sup>-10</sup>  |
| cttctc               | 25                  | 5.75                | 2.6x10 <sup>-9</sup>   |
| agaagaa              | 42                  | 14.63               | 4.1x10 <sup>-9</sup>   |
| gccgaca <sup>a</sup> | 12                  | 1.22                | 7.1x10 <sup>-9</sup>   |
| accgaca <sup>a</sup> | 16                  | 2.48                | 9.6x10 <sup>-9</sup>   |
| cgacac <sup>a</sup>  | 14                  | 1.85                | 1.1x10 <sup>-8</sup>   |
| gtcggta <sup>a</sup> | 13                  | 1.67                | 2.7x10 <sup>-8</sup>   |
| gtcggca              | 10                  | 1.03                | 1.5x10 <sup>-7</sup>   |
| agccgac              | 10                  | 1.11                | 3.0x10 <sup>-7</sup>   |
| acacgtg              | 15                  | 3.18                | 1.4x10 <sup>-6</sup>   |
| aataatg              | 38                  | 16.26               | 2.9x10 <sup>-6</sup>   |
| gccgacc              | 7                   | 0.62                | 4.1x10 <sup>-6</sup>   |
| aagaaga              | 37                  | 15.87               | 4.1x10 <sup>-6</sup>   |
| accgact <sup>a</sup> | 11                  | 1.87                | 4.4x10 <sup>-6</sup>   |
| cacgtgg              | 11                  | 1.88                | 4.6x10 <sup>-6</sup>   |
| aggtcgg <sup>a</sup> | 8                   | 0.95                | 7.1x10 <sup>-6</sup>   |
| aactgat              | 17                  | 4.61                | 7.1x10 <sup>-6</sup>   |
| aagaaaa              | 82                  | 48.74               | 8.5x10 <sup>-6</sup>   |
| acgtggc              | 10                  | 1.66                | 9.5x10 <sup>-6</sup>   |
| agaggaa              | 18                  | 5.26                | 1.1x10 <sup>-5</sup>   |
| acgtcgg <sup>a</sup> | 8                   | 1.1                 | 2.0x10 <sup>-5</sup>   |
| cgtgga               | 9                   | 1.45                | 2.1x10 <sup>-5</sup>   |
| cacacac              | 15                  | 4.22                | 3.6x10 <sup>-5</sup>   |
| attatta <sup>c</sup> | 49                  | 26.11               | 4.1x10 <sup>-5</sup>   |

**Supplemental Table 2.** Table showing frequencies of occurrence of heptamer sequences in the promoters of the 81 genes not misregulated in *sfr6* mutants, and probabilities of occurrence relative to whole genome.

| Motif   | Observed occurrences | Expected occurrences | Occurrence probability |
|---------|----------------------|----------------------|------------------------|
| aggccca | 24                   | 2.27                 | $6.4 \times 10^{-17}$  |
| ggcccaa | 24                   | 3.66                 | $1.6 \times 10^{-12}$  |
| aacccta | 24                   | 3.9                  | $5.7 \times 10^{-12}$  |
| aagccca | 27                   | 5.1                  | $8.8 \times 10^{-12}$  |
| cttcttc | 26                   | 5.9                  | $9.6 \times 10^{-10}$  |
| agcccat | 20                   | 3.56                 | $1.5 \times 10^{-9}$   |
| accctaa | 19                   | 3.72                 | $1.7 \times 10^{-8}$   |
| agaagaa | 38                   | 13.37                | $2.8 \times 10^{-8}$   |
| atgggcc | 15                   | 2.5                  | $6.9 \times 10^{-8}$   |
| gggccta | 12                   | 1.53                 | $8.3 \times 10^{-8}$   |
| aaaccct | 23                   | 6.53                 | $4.2 \times 10^{-7}$   |
| aaacaaa | 82                   | 45.06                | $4.9 \times 10^{-7}$   |
| attgggc | 17                   | 4.04                 | $1.3 \times 10^{-6}$   |
| ccctaaa | 19                   | 5.06                 | $1.6 \times 10^{-6}$   |
| acacgcg | 9                    | 1.06                 | $1.8 \times 10^{-6}$   |
| accctag | 10                   | 1.6                  | $7.1 \times 10^{-6}$   |
| aatgggc | 15                   | 3.81                 | $1.1 \times 10^{-5}$   |
| aaagccc | 18                   | 5.67                 | $2.8 \times 10^{-5}$   |
| agcccaa | 17                   | 5.23                 | $3.4 \times 10^{-5}$   |
| aagaaga | 32                   | 14.75                | $6.7 \times 10^{-5}$   |
| taattaa | 41                   | 21.35                | $1.0 \times 10^{-4}$   |
| gcccata | 12                   | 3.18                 | $1.2 \times 10^{-4}$   |
| aacaaaa | 72                   | 45.06                | $1.3 \times 10^{-4}$   |

**Supplemental Table 3**      **Oligonucleotides used in this study.****Primers for cloning**

| Gene        | forward primer                     | reverse primer               |
|-------------|------------------------------------|------------------------------|
| <i>CBF1</i> | CCTCTAGAGGTACCATGAACTCATTTTCAGCTTT | GGCTCGAGGTAACCTCAAAGCGACACGT |

**Primers for real time qRT-PCR detection of transcripts**

| Gene                        | AGI code  | forward primer             | reverse primer            |
|-----------------------------|-----------|----------------------------|---------------------------|
| <i>PEX4</i>                 | At5g25760 | TCATAGCATTGATGGCTCATCCT    | ACCCTCTCACATCACCAGATCTTAG |
| <i>KIN2</i>                 | At5g15970 | CAACAGCGGGAAAGAGTAT        | CAACAACAAGTACGATGAGTACGA  |
| <i>GOLS3</i>                | At1g09350 | CAAAGTTGTCCCTCCACAC        | GAGCATGGCCAAGACAAGAT      |
| <i>At3g52740</i>            | At3g52740 | GAAGCATCGGAGAGAGATCG       | AGCAGTACGTGCAGACGAGA      |
| <i>At1g20030</i>            | At1g20030 | TTTCGCTCCCTGAAGAAGAA       | CCTTGACATAACTCCGGAGAA     |
| <i>At1g68500</i>            | At1g68500 | AGCTCTGTGTGGTTGCCTTT       | CGTCCAAAACAACATCATTG      |
| <i>At5g62360</i>            | At5g62360 | AGCCATGCTCAAATTTGGTTC      | TGGGTACGTTGTGAAAAGTGC     |
| <i>At5g46710</i>            | At5g46710 | CCATGAAACTTCGATTGAGC       | CGAGAACCCAAATCGAGAAA      |
| <i>ABF1</i>                 | At1g49720 | AATGAAAACCCATAATAGTGAGGTAA | ATTGTCTTTTGCCAGCAAT       |
| <i>SZF2</i>                 | At2g40140 | TCAAAAACCCCAACCACTTC       | TGCACCGCACATATCTCTTC      |
| <i>LTI78</i>                | At5g52310 | GCACCCAGAAGAAGTTGAACA      | TCATGCTCATTGCTTTGTCC      |
| <i>COR15A</i>               | At2g42540 | CGTTGATCTACGCCGCTAAAG      | CTCACCATCTGCTAATGCC       |
| <i>DIN6</i>                 | At3g47340 | GGCCAAGAGAGTTCGTGTTC       | AGACGTTGATGGGCCAAGTA      |
| <i>BCAT2</i>                | At1g10070 | CGCAAACTCTGTTTCTACCTC      | GATGCAGCTTGTGCGTTGTA      |
| <i>SFR6</i>                 | At4g04920 | CGCTGAGAGATTCTGGTGGA       | TGAAACTATCCCATCCTCTGC     |
| <i>MED14</i>                | At3g04740 | TAGCTTTGGTTCAGGCGTTT       | GGCCATAGTTGGTCAGGAGA      |
| <i>PFT1</i>                 | At1g25540 | GGAACGGAATGAGAATGGTG       | ATTGTTGGAAGCTGCTTTGG      |
| <i>MED2 (MED32)</i>         | At1g11760 | GCGCATAGTCTCCCTCCCAT       | CCATCGAACCTCTACTCATC      |
| <i>MED5a (MED33a; RFR1)</i> | At3g23590 | GCCTTGCAATGCCATTGTA        | GGAAGTCAAACCAAGTTTCG      |
| <i>MED5b (MED33b; REF4)</i> | At2g48110 | GCCCTGCATGCCTATTGTG        | TCGCTCCAGCGCTTCACT        |
| <i>MED8</i>                 | At2g03070 | AAAGTCAGATACCAGCACTTCAT    | CTGCTCTTGAGACATGCTATGC    |

**Primers for ChIP**

| Gene/position          | AGI code  | forward primer            | reverse primer              |
|------------------------|-----------|---------------------------|-----------------------------|
| <i>GOLS3 pro</i>       | At1g09350 | TCGGTACGTCTTTTTCTTTCA     | CTTGTAAGCCAAAATGCTCAA       |
| <i>KIN2 pro</i>        | At5g15970 | AAACGACACGTGATGTCTTGA     | TGCCACGTGTAATCTGAAACC       |
| <i>PEX4 pro</i>        | At5g25760 | CTCGCCGGATCAATCTTAG       | TAAGGAAACGAAACCCGGATG       |
| <i>TSI-A</i>           | silent    | CTCGTGAGGGTTTGTGAGGT      | AGTATAAGCGCCACCCAGT         |
| <i>PEX4 Mid</i>        | At5g25760 | CTTGGACGCTTCAGTCTGTG      | GAACGCCATGCTTACTTTT         |
| <i>GOLS3 -500</i>      | At1g09350 | TGCATATTTTTACCAAAAACAAAA  | ATTTTTCTTTTTGTCTAACGTC      |
| <i>GOLS3 TSS</i>       | At1g09350 | CCATAATCACGGCCTCAAAG      | TCATCTCAGGTGCCATCTTG        |
| <i>GOLS3 Stall</i>     | At1g09350 | GGAACCCGAGACTACGTGAA      | GCCTTGGTCCAATAGCTGTC        |
| <i>GOLS3 Mid</i>       | At1g09350 | TGGGGCAGCTACCACTATACA     | GAGCATGGCCAAGACAAGAT        |
| <i>GOLS3 End</i>       | At1g09350 | TTCACAGGAAACCGAAAACC      | ACAAGAACCTCGCTCGTCAG        |
| <i>GOLS3 3IGR</i>      | At1g09350 | TGCAATTGGTAAAGTTCTTCATTTT | TTTTAGAAGAGATTGTGTGTTGCAT   |
| <i>KIN2 -500</i>       | At5g15970 | ATGAAAATACGGGAGGTTTCG     | GTTGTTGCATATGCGTTTGG        |
| <i>KIN2 TSS</i>        | At5g15970 | GATTACACGTGGCACCACAC      | GGAAGGCATTCTTGTGGTTC        |
| <i>KIN2 Stall</i>      | At5g15970 | GCTGGCAAAGCTGAGGTACT      | CCATGGTCAACAAAAATCAA        |
| <i>KIN2 End</i>        | At5g15970 | AGTATATCGGATGCGGCAGT      | TCCCAAATTTTATTTGAAAATCC     |
| <i>KIN2 3IGR</i>       | At5g15970 | CGAAATCGTTGTGGTCAATG      | ACAATGACGCAGAGCAAACA        |
| <i>At3g52740 -500</i>  | At3g52740 | AGTTGAGTTTTGGTCACACAAAAA  | AACCTAAAATTCTATCAAGTGATCAAG |
| <i>At3g52740 TSS</i>   | At3g52740 | CGTCGACGTGTAAGACAACC      | TTGCAGGAAACAAAAGATGAA       |
| <i>At3g52740 Stall</i> | At3g52740 | TGATGAACATCGACGATACGA     | GCTTCGGTTTCTCTTCAAGC        |
| <i>At3g52740 End</i>   | At3g52740 | TCGTCTGCACGTACTGCTCT      | TTGAGGAACAAGAACCACATTT      |
| <i>At3g52740 3IGR</i>  | At3g52740 | TGCAATGTGTCGCTCTAAA       | TAGGAAAACGGCAAATGTC         |
| <i>At1g20030 TSS2</i>  | At1g20030 | CATGAGAAAAAGAAAAGAATCTCG  | AAGAAAAGAGAGAATAAACATTAGCC  |
| <i>At1g20030 Mid</i>   | At1g20030 | GAATAGCGTCGACGGGAAG       | GTAGCTATAGGCGCGTGGAC        |
| <i>At1g20030 End</i>   | At1g20030 | TGTGGTGGTTCTTCTGACCA      | CAACGTTTGGTCATGTGGAGT       |
| <i>At1g20030 -250</i>  | At1g20030 | AATGGTTTCTTAGGACACTTGAA   | TTTTATGGCTTGGAGTTGGA        |
| <i>At1g20030 3IGR</i>  | At1g20030 | ACATGGGCTATTCTCAACG       | TTAGGCGCTGGAGGATTC          |
| <i>At5g46710 MID</i>   | At5g46710 | TGCCTGAGGTGCTGTTATC       | CAAGGGAGGTAATGGATGCT        |
| <i>LTI78 MID</i>       | At5g52310 | GACTCCGCTCAATGAGAAGG      | CCGCCACATAATCTCTACCC        |
| <i>COR15a MID</i>      | At2g42540 | CAGATGGTGAGAAAGCGAAAG     | CTTGTGTTGCGGCTTCTTTTC       |
| <i>ABF1 MID</i>        | At1g49720 | CAGGCTTATACCTTGGAACTGG    | TTCAGCCTGCAACATAGAGAGA      |
